# Supplementary material for: Inhibition of the inflammatory cytokine tumor necrosis factor-alpha with etanercept provides protection against lethal H1N1 influenza infection in mice
Source: PubMed Central journal article supplement (PMC4057515; doi:10.1186/cc13171), 2013-12-27
Supplement: cc13171-S1.pdf [file cc13171-S1.pdf]

**Table 1**

| Name                     | Oligo          | Primer sequence                | Predicted size(bp) | Genebank accession                          |
|--------------------------|----------------|--------------------------------|--------------------|---------------------------------------------|
| influenza A virus M gene | Forward primer | 5'-GACCGATCCTGTACCTCTGAC-3'    | 106                | JN391198(H1N1)                              |
|                          | Reverse primer | 5'-AGGGCATTCTGGACAAAGCGTCTA-3' |                    | JN391191(H1N1)<br>JN391243(H1N2)<br>171~276 |
| GAPDH                    | Forward primer | 5'-ACCACCATGGAGAAGGCTGG-3'     | 528                | XM_003820309                                |
|                          | Reverse primer | 5'-CTCAGTGTAGCCCAGGATGC-3'     |                    | 481~1008                                    |
| TLR3                     | Forward primer | 5'-GCGTTGCGAAGTGAAGAA-3'       | 133                | NM_126166                                   |
|                          | Reverse primer | 5'-TCAAGAGGAGGGCGAATA-3'       |                    |                                             |
| TLR4                     | Forward primer | 5'-GCACTGTTCTTCTCCTGCC-3'      | 294                | NM_021297                                   |
|                          | Reverse primer | 5'-GTTTCCTGTCAAGTATCAAG-3'     |                    | 61~354                                      |
| TLR7                     | Forward primer | 5'-GGTGGCAAAATTGGAAGATCC-3'    | 111                | NM_133211<br>2927~3037                      |
|                          | Reverse primer | 5'-AGCTGTATGCTCTGGGAAAGGTT-3'  |                    |                                             |
| MyD88                    | Forward primer | 5'-CCAGAGTGGAAAGCAGTGTC-3'     | 395                | NM_010851                                   |
|                          | Reverse primer | 5'-GTCCTTCTTCATCGCCTTGT-3'     |                    |                                             |
| TRIF                     | Forward primer | 5'-CCACGTCCTACACGGAAGAT-3'     | 246                | NM_019706<br>NM_207623<br>326~571           |
|                          | Reverse primer | 5'-AACAGCATCTGCAGCTACCA-3'     |                    |                                             |
| NF-κB p65                | Forward primer | 5'-ATGTGCATCGGCAAGTGG-3'       | 294                | NM_009045                                   |
|                          | Reverse primer | 5'-CAGAAGTTGAGTTTCGGGTAG-3'    |                    | 1073~1366                                   |
